# Importance of Toll-like Receptor 2 in Mitochondrial Dysfunction during Polymicrobial Sepsis

Yu Gong, Ph.D., Lin Zou, M.D., Ph.D., Yan Feng, M.D., Ph.D., Dan Li, M.D., Jiayan Cai, B.S., Dunjin Chen, M.D., Ph.D., Wei Chao, M.D., Ph.D.

## ABSTRACT

**Background:** Toll-like receptor 2 (TLR2) contributes to sepsis pathogenesis such as deleterious systemic inflammation, cardiac dysfunction, and high mortality in animal studies. Mitochondrial dysfunction is a key molecular event that is associated with organ injury in sepsis. The role of TLR2 in sepsis-induced mitochondrial dysfunction remains unclear.

**Methods:** Intracellular hydrogen peroxide ( $H_2O_2$ ), mitochondrial superoxide ( $O_2^-$ ), mitochondrial membrane potential ( $\Delta\Psi_m$ ), and intracellular adenosine triphosphate (ATP) were measured in peritoneal leukocytes. A mouse model of polymicrobial sepsis was generated by cecum ligation and puncture (CLP). Wild-type and TLR2-deficient (TLR2<sup>-/-</sup>) mice were subjected to sham or CLP. Mitochondrial functions including reactive oxygen species (ROS),  $\Delta\Psi_m$ , intracellular ATP, and complex III activity were measured.

**Results:** TLR2/1 activation by Pam3Cys enhanced intracellular  $H_2O_2$  and mitochondrial  $O_2^-$  production in leukocytes, but had no effect on mitochondrial  $\Delta\Psi_m$  and ATP production. The effect was specific for TLR2/1 as TLR3 or TLR9 ligands did not induce ROS production. Polymicrobial sepsis induced mitochondrial dysfunction in leukocytes, as demonstrated by increased  $H_2O_2$  and mitochondrial  $O_2^-$  production (CLP *vs.* sham;  $H_2O_2$ :  $3,173 \pm 498$ ,  $n = 5$  *vs.*  $557 \pm 38$ ,  $n = 4$ ;  $O_2^-$ :  $707 \pm 66$ ,  $n = 35$  *vs.*  $485 \pm 35$ ,  $n = 17$ , mean fluorescence intensity, mean  $\pm$  SEM), attenuated complex III activity ( $13 \pm 2$ ,  $n = 16$  *vs.*  $30 \pm 3$ ,  $n = 7$ , millioptical densities/min), loss of mitochondrial  $\Delta\Psi_m$ , and depletion of intracellular ATP ( $33 \pm 6$ ,  $n = 11$  *vs.*  $296 \pm 29$ ,  $n = 4$ , nmol/mg protein). In comparison, there was significant improvement in mitochondrial function in septic TLR2<sup>-/-</sup> mice as evidenced by attenuated mitochondrial ROS production, better-maintained mitochondrial  $\Delta\Psi_m$ , and higher cellular ATP production.

**Conclusions:** TLR2 signaling plays a critical role in mediating mitochondrial dysfunction in peritoneal leukocytes during polymicrobial sepsis. (ANESTHESIOLOGY 2014; 121:1236-47)

**S**EPSIS is defined as the systemic inflammatory response syndrome that occurs during infection.<sup>1</sup> It has an estimated incidence of 751,000 cases each year.<sup>2</sup> Both the incidence of sepsis and the overall sepsis-related mortality have increased significantly between 1993 and 2003.<sup>3</sup> Similarly, the rate of severe postoperative sepsis in surgical patients has more than doubled between 2001 and 2006.<sup>4</sup> Sepsis is the 10th leading cause of death in the United States.<sup>5</sup>

A major cause of death in patients with severe sepsis is multiple organ failure, but the underlying pathogenesis is not fully understood. Mitochondrial damage and dysfunction has been recognized as an important molecular pathology in sepsis<sup>6-9</sup> and linked to the severity of organ dysfunction and possibly outcome of sepsis.<sup>10,11</sup> The increased production of cellular reactive oxygen species (ROS) of mitochondrial origin during sepsis can cause significant oxidative stress to cells<sup>12</sup> and may severely inhibit oxidative phosphorylation and adenosine triphosphate (ATP) generation,<sup>13</sup> which can potentially cause multi-organ failure.<sup>14-16</sup>

Although the host innate immune response is necessary to eradicate invading pathogens, excessive inflammatory responses during sepsis is harmful and may lead to tissue

## What We Already Know about This Subject

- Toll-like receptor 2 (TLR2) plays an essential role in the host immune and inflammatory responses during sepsis
- However, its role in sepsis-induced mitochondrial dysfunction is unclear

## What This Article Tells Us That Is New

- In a mouse model of polymicrobial sepsis, mice lacking TLR2 showed improved mitochondrial function during sepsis compared with wild-type mice
- These data support a critical role for TLR2 in mediating mitochondrial dysfunction during sepsis

injury, in part, by damaging mitochondrial structure and function.<sup>17</sup> Several molecular mechanisms have been proposed responsible for mitochondrial dysfunction.<sup>18</sup> These include attenuated activity of mitochondrial electron transport chain enzyme complexes, inhibitory effects of reactive nitrogen and oxygen species on oxidative phosphorylation and ATP production, increased expression of mitochondrial uncoupling proteins, and the formation of the mitochondrial

This article is featured in "This Month in Anesthesiology," page 1A. Corresponding article on page 1147.

Submitted for publication February 25, 2014. Accepted for publication July 8, 2014. From the Department of Anesthesia, Critical Care, and Pain Medicine, Massachusetts General Hospital, Harvard Medical School, Boston, Massachusetts (Y.G., L.Z., Y.F., D.L., J.C., W.C.); and Key Laboratory for Major Obstetric Diseases, Institute of Gynecology and Obstetrics, The Third Affiliated Hospital of Guangzhou Medical University, Guangzhou, China (Y.G., D.C.).

Copyright © 2014, the American Society of Anesthesiologists, Inc. Lippincott Williams & Wilkins. Anesthesiology 2014; 121:1236-47

permeability transition pore. However, the upstream signaling that mediates these molecular events leading to mitochondrial dysfunction in sepsis is poorly understood.

Toll-like receptors (TLRs) play an essential role in the host immune and inflammatory responses during sepsis as well as certain noninfectious tissue injury.<sup>19–21</sup> TLRs may also play a role in regulating mitochondrial function. Djafarzadeh *et al.*<sup>22</sup> have shown that TLR3 activation attenuates maximal mitochondrial respiration in cultured human hepatocytes. West *et al.*<sup>23</sup> demonstrate that TLR1/2/4 signaling augments macrophage bactericidal activity through mitochondrial ROS production. Yet, others have suggested a dual role for TLR4 signaling in modulating mitochondrial function. TLR4 activation not only triggers endotoxin-induced oxidative stress and mitochondrial DNA (mtDNA) damage but also mediates mitochondrial biogenesis by up-regulation of mitochondrial complex IV and mitochondrial transcription factors.<sup>24,25</sup> These data suggest that TLR signaling may have a significant impact on mitochondrial function during bacterial sepsis.

TLR2 forms a heterodimer with either TLR1 or TLR6. The resulting TLR2/TLR1 and TLR2/TLR6 complexes recognize distinct ligands triacyl and diacyl lipoproteins, respectively. We have previously demonstrated the significant contribution of TLR2 signaling to the pathogenesis of polymicrobial sepsis.<sup>26–28</sup> TLR2 activation by bacterial wall components induces cardiomyocyte inflammatory response and dysfunction *in vitro*.<sup>26</sup> TLR2 mediates intracellular hydrogen peroxide (H<sub>2</sub>O<sub>2</sub>) production<sup>28</sup> and contributes to cardiac dysfunction and mortality<sup>27</sup> in septic animals. The survival benefit of TLR2 deficiency was also confirmed recently<sup>29</sup> and in *Pseudomonas aeruginosa* sepsis model.<sup>30</sup> In the current study, we tested the hypothesis that TLR2 mediates mitochondrial dysfunction during polymicrobial sepsis. Specifically, we tested the effect of TLR activation on mitochondrial function in isolated leukocytes *in vitro* and determined the impact of TLR2 deletion on mitochondrial dysfunction in a mouse model of peritoneal polymicrobial sepsis.

## Materials and Methods

### Animals

Eight- to 12-week-old gender-, age-, and strain-matched mice were used for the studies. Wild-type (WT) (C57BL/6J) mice were purchased from Jackson Laboratories (Bar Harbor, ME) and housed in a animal facility at Massachusetts General Hospital for at least 1 week before experiments. TLR2<sup>-/-</sup> mice were generated by Takeuchi *et al.*<sup>31</sup> All animals were housed in pathogen-free, temperature-controlled, and air-conditioned facilities with 12 h/12 h light/dark cycles and fed with the same bacteria-free diet. Animal care and procedures were performed according to the protocols approved by the Massachusetts General Hospital Subcommittee on Research Animal Care and were in compliance with the “Guide for the Care and Use of Laboratory Animals” published by the National Institutes of Health. Simple randomization method was used to assign animals to various experimental conditions.

### Reagents

Pam3Cys, poly (I:C), CpG were purchased from Enzo Life Science (Farmingdale, NY). Lipopolysaccharide (*Escherichia coli* 0111:B4) and lipoteichoic acid (LTA) were from Sigma-Aldrich (St Louis, MO). Dichlorodihydrofluorescein diacetate (H2-DCF-DA), MitoSOX red reagent, and 5,5',6,6'-tetrachloro-1,1',3,3'-tetraethylbenzimidazolylcarbocyanine iodide (JC-1) were purchased from Invitrogen-Molecular Probes (Eugene, OR). Antimycin A and tetramethylrhodamine ethyl ester perchlorate (TMRE) were purchased from Sigma-Aldrich. ATP bioluminescence assay kit CLS II was purchased from Roche Molecular Biochemicals (Indianapolis, IN). MitoTox OXPHOS Complex III Activity Kit was from Abcam (Cambridge, MA).

### Peritoneal Cell Isolation after Thioglycollate Injection

Peritoneal cells were elicited chemically by intra-peritoneal injection of 4% thioglycollate. After 12–16 h, 6 ml of Dulbecco's phosphate-buffered saline (DPBS) without calcium and magnesium was injected into the peritoneal space and mixed thoroughly by gentle massage. The peritoneal lavage fluid was collected and centrifuged at 1,500 rpm for 5 min. The supernatants were discarded and the cell pellets were suspended in RPMI 1640 containing 0.05% bovine serum albumin. We have previously shown that more than 85% of the peritoneal cells are Gr-1<sup>+</sup> neutrophils.<sup>32</sup>

### Peritoneal Cell Collection after Surgery

Twenty-four hours after sham or cecum ligation and puncture (CLP) surgery, 6 ml of ice-cold DPBS without calcium and magnesium was injected into the peritoneal space and mixed thoroughly by gentle massage. Five milliliters of the peritoneal lavage were collected and centrifuged at 1,500 rpm for 5 min. The supernatants were discarded and the cell pellets were suspended in RPMI 1640. We have previously shown that more than 90% of the peritoneal cells from the CLP mice are Gr-1<sup>+</sup> neutrophils.<sup>33</sup>

### Reactive Oxygen Species

Total intracellular H<sub>2</sub>O<sub>2</sub> was measured with dichlorodihydrofluorescein diacetate (H2-DCF-DA, Cat. D399, Invitrogen), whereas mitochondrial superoxide (O<sub>2</sub><sup>-</sup>) was assayed with MitoSOX (Cat. M36008, Invitrogen). Specifically, peritoneal neutrophils were harvested, plated in 96-well plate, and treated with antimycin A (Cat. A8674, Sigma) or TLR ligands as indicated. At the end of treatment, cells were incubated with freshly prepared H2-DCF-DA or MitoSOX at 37°C in the dark for 30 min. Unstained controls were handled similarly except that treatments and dyes were omitted. Dye-loaded cells were resuspended in cold DPBS containing 1% fetal bovine serum and analyzed immediately by flow cytometry at fluorescein isothiocyanate or R-phycoerythrin channel. Ten thousand cells were routinely counted by flow cytometry, and data expressed as the median fluorescence intensity in arbitrary units from at least three separate experiments. In some experiments, MitoSOX-stained cells attached

to pre-coated plates (with 5  $\mu\text{g}/\text{ml}$  of fibronectin and 20  $\mu\text{g}/\text{ml}$  of gelatin) were analyzed for ROS production under fluorescence microscope at Texas Red channel.

### Mitochondrial Membrane Potential

Two methods were employed to measure mitochondrial membrane potential ( $\Delta\Psi\text{m}$ ). First, we used TMRE (Cat. 87917, Sigma) to measure levels of  $\Delta\Psi\text{m}$ . TMRE is a cationic dye that is rapidly and reversibly accumulated by healthy mitochondria. Decrease in the levels of TMRE indicates reduction in mitochondrial membrane potential levels. Experimentally, a fraction of cells ( $5 \times 10^5$ ) from the peritoneal lavage was labeled with freshly prepared TMRE at 37°C in the dark for 30 min. Unstained controls were treated similarly, except that ligand treatment and dyes were omitted. Dye-loaded cells were immediately re-suspended in cold DPBS containing 1% fetal bovine serum and analyzed immediately by flow cytometry at the R-phycoerythrin channel. Ten thousand cells were routinely collected, and data were expressed as the mean fluorescence intensity (MFI) in arbitrary units from the average of at least three separate experiments. Second, we measured mitochondrial  $\Delta\Psi\text{m}$  using JC-1 dye (Invitrogen, MP 03168). Specifically, peritoneal leukocytes were treated with antimycin A or stimulated with TLR ligands as indicated. At the end of treatments, cells were incubated with 2  $\mu\text{M}$  JC-1 at 37°C for 30 min and washed twice with DPBS. Finally, fluorescence was read at red fluorescence (excitation: 535 nm; emission: 590 nm) and green fluorescence (excitation: 485 nm; emission: 530 nm) using a fluorescence plate reader. The level of  $\Delta\Psi\text{m}$  was calculated by ratio of red fluorescence to green fluorescence.

### ATP Assay

Intracellular ATP level was measured by a luciferase-based assay using the ATP Bioluminescence Assay Kit CLS II (Roche Molecular Biochemicals). In brief, intracellular ATP was released using a boiling method. Specifically, peritoneal neutrophils were treated with antimycin A or stimulated with TLR ligands as indicated. At the end of treatments, cells were then harvested, washed twice with ice-cold DPBS, drained and resuspended in boiling buffer (100 mM Tris and 4 mM EDTA, pH 7.75). The suspensions were pipetted, vortexed, and snap frozen in liquid nitrogen. Frozen cells were boiled for 3 min in a water bath, placed on ice for 5 min, and then centrifuged at 14,000 rpm for 10 min at 4°C. The supernatant was transferred to a fresh tube and kept on ice until measurement. Finally, 35  $\mu\text{l}$  of luciferase reagent was added to 35  $\mu\text{l}$  of the sample or standard. Experiments were performed in triplicates, and data were standardized to the protein concentration using the Bradford protein assay.

### Mouse Model of Polymicrobial Sepsis

A mouse model of polymicrobial sepsis was generated by CLP as described previously.<sup>27</sup> In brief, the cecum was ligated 1.0 cm from the tip. A through-and-through puncture was made with an 18-gauge needle and a small amount (droplet) of feces was

extruded to ensure the patency of the puncture site before returned it back to the abdominal cavity. The sham-operated mice underwent laparotomy but without CLP. The abdominal wall incision was closed in layers. After surgery, pre-warmed normal saline (50 ml/kg) was administered subcutaneously. Postoperative pain control was managed with subcutaneous injection of bupivacaine (3 mg/kg) and buprenorphine (0.1 mg/kg). Of note, this model of polymicrobial peritonitis in C57BL/6 mice leads to severe sepsis as evidenced by multi-organ dysfunction such as cardiac dysfunction and acute kidney injury with 60–90% of mortality.<sup>27,33</sup>

### Mitochondrial Complex III Activity Assay

Mitochondrial complex III activity was measured using MitoToxOXPHOS Complex III Activity Kit (Cat. ab109905, Abcam) according to the manufacturer's protocol with some modifications. Briefly, cells were lysed by sonication and mitochondrial fractions were re-suspended in ice-cold DPBS. Complex III activity was then measured in a mixture (1:1 ratio) of cell suspension and assay solution containing succinate, rotenone, potassium cyanide, cytochrome c by monitoring complex III-sensitive cytochrome c reduction ( $\lambda = 550 \text{ nm}$ ). Data were collected every 20 s for 5 min after initiation of the reaction.

### Mitochondrial Gene Expression

Mitochondrial transcript factor A (Tfam) and cytochrome c oxidase subunit II (COX-2), both coded by mtDNA, were quantified by real-time quantitative reverse transcription polymerase chain reaction. The following primers were used: Tfam, forward 5'-CATTTATGTATCTGAAAGCTTCC-3', reverse 5'-CTCTTCCCAA GACTTCATTTTC-3'; COX-2, forward 5'-ACCGAGTCGTTCTGCCAATA-3', reverse 5'-GCTTGATTTAGTCG-GCCTGG-3'. Glyceraldehyde 3-phosphate dehydrogenase, forward 5'-AACTTTGGCATTGTGGAAGG-3', reverse 5'-GGATGCAGGGATGATGTTCT-3'.

### Statistical Analysis

Statistical analysis was performed using GraphPad Prism 5 software (GraphPad Software Inc., La Jolla, CA). The distributions of the continuous variables were expressed as the mean  $\pm$  SEM. Data were analyzed by one-way ANOVA with Tukey or two-way ANOVA with Bonferroni *post hoc* tests for statistic significance. Of note, the sample sizes were based on our prior experiences rather than a formal statistical power calculation. The null hypothesis was rejected for *P* value of less than 0.05 with the two-tailed test.

## Results

### TLR2 Activation Leads to Intracellular and Mitochondrial ROS Production in Peritoneal Leukocytes

To establish a system that is reliable and sufficiently sensitive to detect cellular ROS production, we first tested the effect

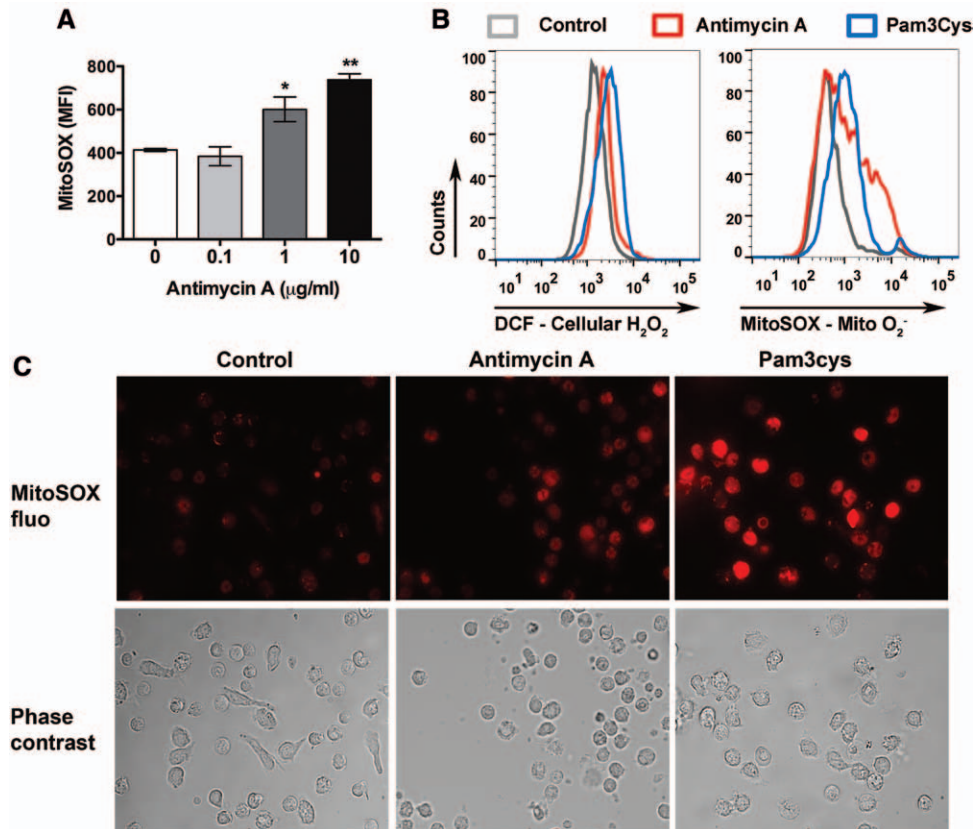

**Fig. 1.** Antimycin A and Pam3Cys induce intracellular  $\text{H}_2\text{O}_2$  and mitochondrial  $\text{O}_2^-$  production in peritoneal leukocytes. (A) Antimycin A leads to a dose-dependent mitochondrial  $\text{O}_2^-$  production. Thioglycollate-elicited peritoneal leukocytes were treated with antimycin A for 1 h and analyzed for mitochondrial  $\text{O}_2^-$  production with flow cytometry.  $n = 3$  in each group. \* $P < 0.05$ , \*\* $P < 0.01$  vs. the untreated controls. Each error bar represents mean  $\pm$  SEM. MFI, mean fluorescence intensity. The experiments were performed twice with similar results. (B, C) Antimycin A- or Pam3Cys-induced intracellular or mitochondrial reactive oxygen species production. Representative histograms of flow cytometry (B) and fluorescent images (C) are presented. Peritoneal leukocytes were treated with antimycin A (10  $\mu\text{g}/\text{ml}$ ) or Pam3Cys (20  $\mu\text{g}/\text{ml}$ ) for 1 h, incubated with 10  $\mu\text{M}$  DCF or 2.5  $\mu\text{M}$  MitoSOX, and then analyzed for cellular  $\text{H}_2\text{O}_2$  or mitochondrial  $\text{O}_2^-$  production, respectively, with flow cytometry (B) or fluorescent microscope (C). DCF = dichlorodihydrofluorescein diacetate;  $\text{H}_2\text{O}_2$  = hydrogen peroxide; Mito  $\text{O}_2^-$  = mitochondrial superoxide; MitoSOX fluo = MitoSOX fluorescence.

of antimycin A on intracellular  $\text{H}_2\text{O}_2$  and mitochondrial  $\text{O}_2^-$  production in the peritoneal leukocytes. Antimycin A is a potent inhibitor of the mitochondrial respiratory chain enzyme complex III and known for its ability to induce mitochondrial  $\text{O}_2^-$  production as demonstrated in figure 1A. As illustrated in figure 1B and C, antimycin A treatment led to both intracellular  $\text{H}_2\text{O}_2$  and mitochondrial  $\text{O}_2^-$  production as measured by flow cytometry and fluorescent microscopy. To determine whether or not TLR signaling induces ROS production, we next stimulated leukocytes with various TLR ligands. Similar to antimycin A, Pam3Cys (a TLR1/2 ligand, 20  $\mu\text{g}/\text{ml}$ ) induced a significant increase in both intracellular  $\text{H}_2\text{O}_2$  and mitochondrial  $\text{O}_2^-$  levels as demonstrated by flow cytometry ( $\text{H}_2\text{O}_2$ : con vs. Pam3,  $531 \pm 57$  vs.  $2426 \pm 89$ ;  $\text{O}_2^-$ : con vs. Pam3,  $848 \pm 38$  vs.  $1,621 \pm 91$ , MFI) (fig. 2A–D) and fluorescent microscopy (fig. 1). In contrast, at the same concentration, LTA (a TLR2/6 ligand), poly (I:C) (a TLR3 ligand) or CpG (a TLR9 ligand) had no effect on intracellular or mitochondrial ROS production.

Lipopolysaccharide (TLR4 ligand) only induced a modest increase in mitochondrial  $\text{O}_2^-$  level (fig. 2A–D). The effect of Pam3Cys was dose-dependent and partially mediated *via* TLR2 as Pam3Cys-induced mitochondrial  $\text{O}_2^-$  production was significantly attenuated in TLR2-deficient leukocytes (WT vs. knockout [KO],  $2,766 \pm 259$  vs.  $2,044 \pm 57$ , MFI) (fig. 2E–G).

#### TLR2 Activation Has No Impact on Mitochondrial Membrane Potential and Intracellular ATP Production

The mitochondrial membrane potential ( $\Delta\Psi_m$ ) is generated by protons transport across the mitochondrial inner membrane. This process is catalyzed by the enzyme complexes I, III, and IV of the electron transport chain and produces the proton motive force to generate ATP. Previous studies have shown that a positive correlation exists between  $\Delta\Psi_m$  reduction and ROS production<sup>34–36</sup> and that ATP depletion represents a hallmark of mitochondrial dysfunction.<sup>37</sup> We therefore analyzed  $\Delta\Psi_m$  response to TLR ligands using

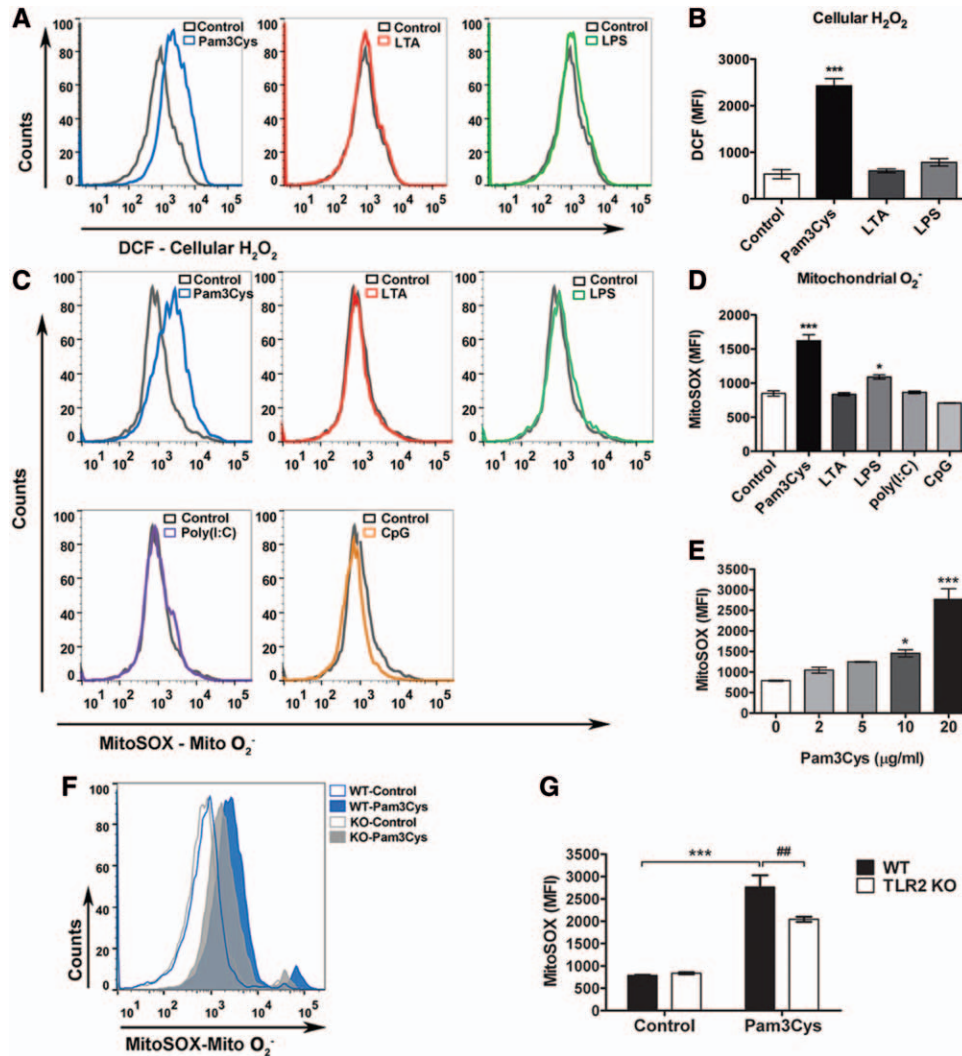

**Fig. 2.** Effect of various Toll-like receptor ligands on intracellular  $\text{H}_2\text{O}_2$  and mitochondrial  $\text{O}_2^-$  production in peritoneal leukocytes. (A, B) Effect of TLR ligands on intracellular  $\text{H}_2\text{O}_2$  generation. Thioglycollate-elicited peritoneal leukocytes were treated with TLR ligands as indicated: Pam3Cys, LTA, or LPS (20  $\mu\text{g}/\text{ml}$ ) for 1 h, incubated with 10  $\mu\text{M}$  of DCF and analyzed for intracellular  $\text{H}_2\text{O}_2$  with flow cytometry. Representative histograms are presented in A and combined MFI data in B.  $n = 3$  in each group.  $***P < 0.001$  vs. control. The experiments were performed twice with the similar results. (C, D) Effect of TLR ligands on mitochondrial  $\text{O}_2^-$  production. Cells were treated with TLR ligands as indicated: Pam3Cys, LTA, LPS, poly (I:C) or CpG (20  $\mu\text{g}/\text{ml}$ ) for 1 h, incubated with 2.5  $\mu\text{M}$  of MitoSOX and analyzed for mitochondrial  $\text{O}_2^-$  production. Representative histograms are presented in C and combined MFI data in D.  $n = 3$  in each group.  $*P < 0.05$ ,  $***P < 0.001$  vs. control. The experiments were performed four times. (E) TLR2 activation induces a dose-dependent mitochondrial  $\text{O}_2^-$  production.  $n = 3$  in each group.  $*P < 0.05$ ,  $***P < 0.001$  vs. untreated control. The experiments were performed twice. (F, G) TLR2 mediates Pam3Cys-induced mitochondrial  $\text{O}_2^-$  production. Peritoneal leukocytes harvested from WT or TLR2 $^{-/-}$  mice were treated with Pam3Cys (20  $\mu\text{g}/\text{ml}$ ) for 1 h and analyzed for mitochondrial  $\text{O}_2^-$  production with flow cytometry. Representative histograms are presented in F and combined MFI data in G.  $n = 3$  in each group.  $***P < 0.001$  vs. control.  $## P < 0.01$  vs. WT. Each error bar represents mean  $\pm$  SEM. DCF = dichlorodihydrofluorescein diacetate;  $\text{H}_2\text{O}_2$  = hydrogen peroxide; LPS = lipopolysaccharides; LTA = lipoteichoic acid; MFI = mean fluorescence intensity; Mito  $\text{O}_2^-$  = mitochondrial superoxide; TLR2KO = TLR2 knockout; WT = wild type. The experiments were performed twice with similar results.

two mitochondrial membrane potential-sensitive fluorescent probes, namely TMRE and JC-1. As illustrated in figure 3A and B, although antimycin A, a complex III inhibitor, induced a dose-dependent reduction in the mitochondrial  $\Delta\Psi\text{m}$ , most TLR ligands tested, *i.e.*, Pam3Cys, LTA, lipopolysaccharide, and CpG, had no effect on  $\Delta\Psi\text{m}$ . Poly (I:C) led to a higher  $\Delta\Psi\text{m}$ . Consequently, antimycin A led to

marked reduction in ATP production in leukocytes (fig. 3C and D). Moreover, absence of glucose in culture media markedly reduced ATP production in the untreated cells (control) and further abolished ATP production in the antimycin A-treated leukocytes (fig. 3C *vs.* fig. 3D). Similar to  $\Delta\Psi\text{m}$  data, Pam3cys and lipopolysaccharide did not reduce cellular ATP production in leukocytes (fig. 3C and D). These

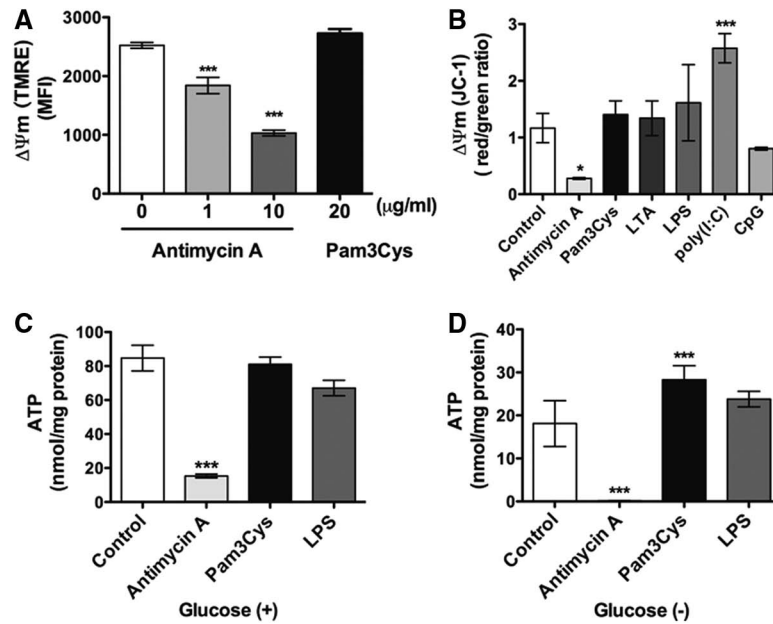

**Fig. 3.** TLR2 activation has no impact on mitochondrial  $\Delta\Psi_m$  and intracellular ATP production. (A, B) Mitochondrial  $\Delta\Psi_m$  measurements. Mitochondrial  $\Delta\Psi_m$  was detected with TMRE (A) or JC-1 (B) dye. (A) Peritoneal leukocytes were treated with the indicated concentrations of antimycin A or Pam3Cys for 1 h and analyzed for  $\Delta\Psi_m$  with flow cytometry.  $***P < 0.001$  vs. control. The numbers of samples in each group: 0  $\mu\text{g/ml}$  antimycin A,  $n = 7$ ; 1  $\mu\text{g/ml}$  antimycin A,  $n = 5$ ; 10  $\mu\text{g/ml}$  antimycin A,  $n = 3$ ; 20  $\mu\text{g/ml}$  Pam3Cys,  $n = 4$ . The experiments were performed twice. (B) Cells were treated with antimycin A or TLR ligands as indicated: Pam3Cys, LTA, LPS, poly (I:C) or CpG, all at 20  $\mu\text{g/ml}$ , for 1 h and analyzed for  $\Delta\Psi_m$  with fluorescence ratio detection.  $n = 3$  in each group.  $*P < 0.05$ ,  $***P < 0.001$  vs. control. The experiments were performed twice. (C, D) ATP production in the presence or absence of glucose. (C) Cells were treated with antimycin A, Pam3Cys, or LPS (all at 20  $\mu\text{g/ml}$ ) in glucose containing medium for 4 h and analyzed for ATP production with a ATP bioluminescence assay kit.  $n = 3$  in each group. The experiments were performed three times. (D) Cells were treated with antimycin A, Pam3Cys, or LPS (all at 20  $\mu\text{g/ml}$ ) in glucose-free medium for 1 h and analyzed for intracellular ATP level,  $***P < 0.001$  vs. control. Each error bar represents mean  $\pm$  SEM. The numbers of samples in each group: control,  $n = 5$ ; antimycin A,  $n = 5$ ; Pam3Cys,  $n = 5$ ; LPS,  $n = 5$ .  $\Delta\Psi_m$  = membrane potential; ATP = adenosine triphosphate; LPS = lipopolysaccharides; LTA = lipoteichoic acid; MFI = mean fluorescence intensity; TMRE = tetramethylrhodamine ethyl ester perchlorate.

data suggest that unlike the complex III blocker antimycin A, TLR activation is not sufficient to induce mitochondrial dysfunction.

### TLR2 Mediates Mitochondrial ROS Production in Leukocytes during Polymicrobial Sepsis

Next, we tested whether or not TLR2 plays a role in leukocyte mitochondrial ROS production in sepsis. We subjected WT and TLR2<sup>-/-</sup> mice to sham or CLP procedure, a clinically relevant animal model of peritoneal polymicrobial sepsis. Twenty-four hours after the procedures, the peritoneal cells were harvested and the intracellular H<sub>2</sub>O<sub>2</sub> and mitochondrial O<sub>2</sub><sup>-</sup> were measured using flow cytometry. As indicated in figure 4, there was a basal level of ROS signal in the peritoneal leukocytes isolated from sham mice. However, in leukocytes harvested from WT septic mice, there was a significant increase in cellular H<sub>2</sub>O<sub>2</sub> and mitochondrial O<sub>2</sub><sup>-</sup> levels. In comparison, both intracellular H<sub>2</sub>O<sub>2</sub> and mitochondrial O<sub>2</sub><sup>-</sup> were markedly reduced in TLR2<sup>-/-</sup> septic mice (intracellular H<sub>2</sub>O<sub>2</sub>: 3,173  $\pm$  498 vs. 1,628  $\pm$  324; mitochondrial O<sub>2</sub><sup>-</sup>: 707  $\pm$  66 vs. 451  $\pm$  37, WT-CLP vs. TLR2 KO-CLP, MFI) (fig. 4).

These data clearly suggest that TLR2 signaling plays an important role in mediating cellular H<sub>2</sub>O<sub>2</sub> and mitochondrial O<sub>2</sub><sup>-</sup> production in the peritoneal leukocytes during polymicrobial sepsis.

### TLR2 Signaling Contributes to Mitochondrial Dysfunction during Polymicrobial Sepsis

Given the role of mitochondrial  $\Delta\Psi_m$  and ATP production in mitochondrial ROS generation, we tested the mitochondrial  $\Delta\Psi_m$  and intracellular ATP concentration in peritoneal leukocytes of animals with polymicrobial peritonitis. We found that there was a marked reduction in the mitochondrial  $\Delta\Psi_m$  and ATP generation in septic WT mice as compared with the sham-operated controls ( $\Delta\Psi_m$ : 4,455  $\pm$  400 vs. 1,694  $\pm$  352, MFI; ATP: 296  $\pm$  29 vs. 33  $\pm$  6 nmol/mg protein; sham vs. CLP in WT, MFI) (fig. 5). TLR2 deletion significantly improved the mitochondrial  $\Delta\Psi_m$  and ATP production ( $\Delta\Psi_m$ : 1,694  $\pm$  352 vs. 2,866  $\pm$  167, MFI; ATP: 33  $\pm$  6 vs. 71  $\pm$  8, nmol/mg protein; WT-CLP vs. TLR2KO-CLP) (fig. 5). These results suggest that TLR2 signaling contributes to the leukocyte mitochondrial dysfunction during polymicrobial sepsis.

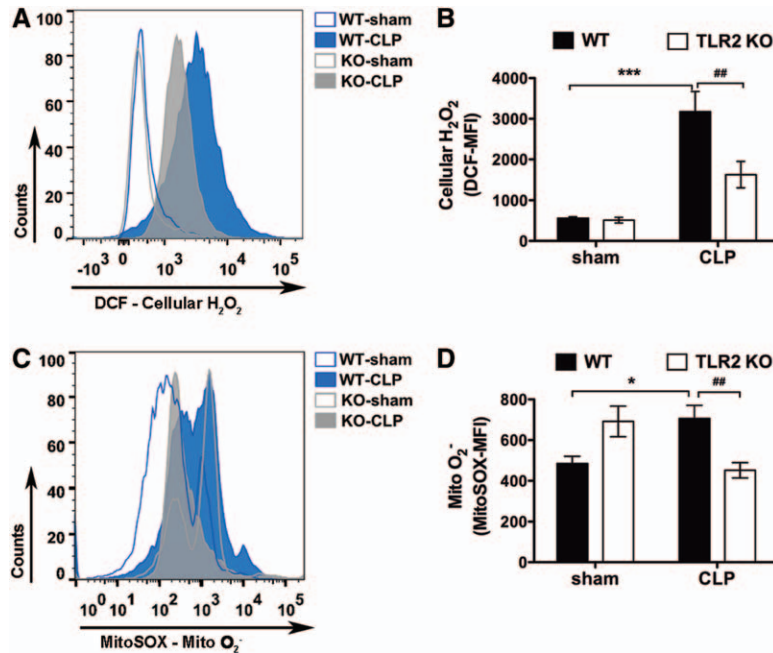

**Fig. 4.** Absence of TLR2 attenuates leukocyte cellular H<sub>2</sub>O<sub>2</sub> and mitochondrial O<sub>2</sub><sup>-</sup> production during polymicrobial sepsis. WT and TLR2<sup>-/-</sup> mice were subjected to sham or CLP procedures. After 24h, peritoneal leukocytes were harvested, stained with either 10 μM of DCF or 2.5 μM of MitoSOX, and analyzed with flow cytometry for intracellular H<sub>2</sub>O<sub>2</sub> (A, B) or mitochondrial O<sub>2</sub><sup>-</sup> (C, D) production. The numbers of samples in B: WT-Sham, n = 4; WT-CLP, n = 5; TLR2KO-Sham, n = 5; TLR2KO-CLP, n = 5. The numbers of samples in D: WT-Sham, n = 17; WT-CLP, n = 35; TLR2KO-Sham, n = 15; TLR2KO-CLP, n = 23. \**P* < 0.05, \*\*\**P* < 0.001 vs. sham. ##*P* < 0.01 vs. WT. Each error bar represents mean ± SEM. CLP = cecum ligation and puncture; DCF = dichlorodihydrofluorescein diacetate; H<sub>2</sub>O<sub>2</sub> = hydrogen peroxide; KO = knockout; MFI = mean fluorescence intensity; Mito O<sub>2</sub><sup>-</sup> = mitochondrial superoxide; WT = wild type.

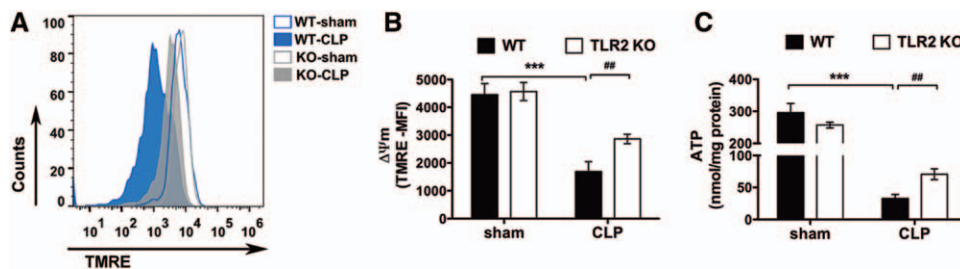

**Fig. 5.** TLR2<sup>-/-</sup> mice have improved leukocyte mitochondrial ΔΨm and intracellular ATP production during severe sepsis. (A, B) Mitochondrial ΔΨm. WT and TLR2<sup>-/-</sup> mice were subjected to sham or CLP surgical procedures. After 24h, the peritoneal cells were harvested, stained with TMRE and analyzed for ΔΨm. (A) Representative flow cytometry histograms; (B) combined MFI. The numbers of samples in each group: WT-Sham, n = 5; WT-CLP, n = 12; TLR2KO-Sham, n = 5; TLR2KO-CLP, n = 12. \*\*\**P* < 0.001 vs. sham. ##*P* < 0.01 vs. WT. (C) Cellular ATP. Mice were subjected to sham or CLP and after 24h, the peritoneal cells were harvested and analyzed for intracellular ATP level by ATP bioluminescence assay. The numbers of samples in each group: WT-Sham, n = 4, WT-CLP: n = 11, TLR2KO-Sham, n = 5, TLR2KO-CLP, n = 12. \*\*\**P* < 0.001 vs. sham. ##*P* < 0.01 vs. WT. Each error bar represents mean ± SEM. ΔΨm = membrane potential; ATP = adenosine triphosphate; CLP = cecum ligation and puncture; MFI = mean fluorescence intensity; TMRE = tetramethylrhodamine ethyl ester perchlorate; TLR2KO = TLR2 knockout; WT = wild type.

### Polymicrobial Sepsis Inhibit Mitochondrial Complex III Activity in Peritoneal via a TLR2-independent Mechanism

Studies have demonstrated that complex III is one of the principal sites responsible for mitochondrial ROS generation.<sup>38</sup> We next examined the complex III activities in leukocytes isolated from sham and septic animals and tested the impact of TLR2 deficiency on their activities during polymicrobial sepsis. As illustrated in figure 6, there was a marked

reduction in the complex III activity in WT CLP mice as compared with the sham control mice (30 ± 3 vs. 13 ± 2, sham vs. CLP in WT, millioptical densities/min). However, TLR2-deficient mice did not have improved complex III function as compared with WT mice after CLP. These data clearly suggest that TLR2 signaling mediates ROS production and mitochondrial dysfunction during polymicrobial sepsis *via* a complex III-independent mechanism.

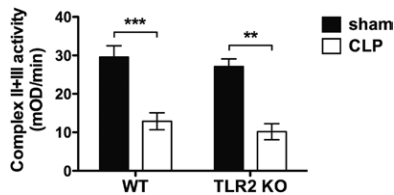

**Fig. 6.** TLR2 deletion has no effect on leukocyte mitochondrial complex II/III enzyme activity during polymicrobial sepsis. WT and TLR2<sup>-/-</sup> mice were subjected to sham or CLP surgical procedures. After 24h, the peritoneal cells were harvested and analyzed for mitochondrial complex II/III activity by MitoTox OXPPOS Complex III Activity Kit. The numbers of animals in each group: WT-Sham, n = 7; WT-CLP, n = 16; TLR2KO-Sham, n = 3; TLR2KO-CLP, n = 7. \*\**P* < 0.01, \*\*\**P* < 0.001 vs. sham. Each error bar represents mean ± SEM. CLP = cecum ligation and puncture; TLR2KO = TLR2 knockout; WT = wild type.

### Polymicrobial Sepsis Induces Mitochondrial Tfam and COX-2 Depletion

Mitochondrial oxidative stress can lead to mtDNA damage and depletion. The mtDNA is reported to be more susceptible to oxidative stress than nuclear DNA.<sup>39</sup> Studies have demonstrated that lipopolysaccharide induces mitochondrial oxidative stress and mtDNA depletion.<sup>40</sup> We examined the effect of polymicrobial sepsis on the expression of the two mitochondrial molecules, namely mitochondrial transcript factor A (Tfam) and COX-2, both coded by mtDNA. As shown in figure 7A, compared with sham mice, CLP led to significantly lower Tfam and COX-2 gene expression in the liver. This effect seemed more prominent in the liver as CLP did not significantly impact on Tfam and COX-2 expression in the heart or peritoneal leukocytes within the same period of time (24 h) (fig. 7B and C). Similar to mitochondrial complex III activity shown in fig. 6, TLR2 deficiency did not reverse the reduced Tfam and COX-2 gene expression in the septic liver (fig. 7A).

### Discussion

The current study demonstrates a pivotal role of TLR2 signaling in mediating mitochondrial ROS production as well as mitochondrial dysfunction in a clinically relevant mouse model of severe polymicrobial sepsis. First, we found that activation of TLR1/2, but not TLR2/6, TLR3, TLR4, or TLR9, was capable of inducing a robust intracellular and mitochondrial ROS production in leukocytes. We also found that while the inhibition of mitochondrial respiratory complex III reliably caused mitochondrial dysfunction as evidenced by reduced mitochondrial  $\Delta\Psi_m$  and cellular ATP production, TLR1/2 activation appeared insufficient to induce mitochondrial dysfunction in isolated leukocytes. Second, we found that polymicrobial peritonitis sepsis led to a marked mitochondrial dysfunction in peritoneal leukocytes with increased intracellular and mitochondrial ROS, decreased mitochondrial  $\Delta\Psi_m$ , reduced intracellular ATP, and markedly inhibited mitochondrial complex

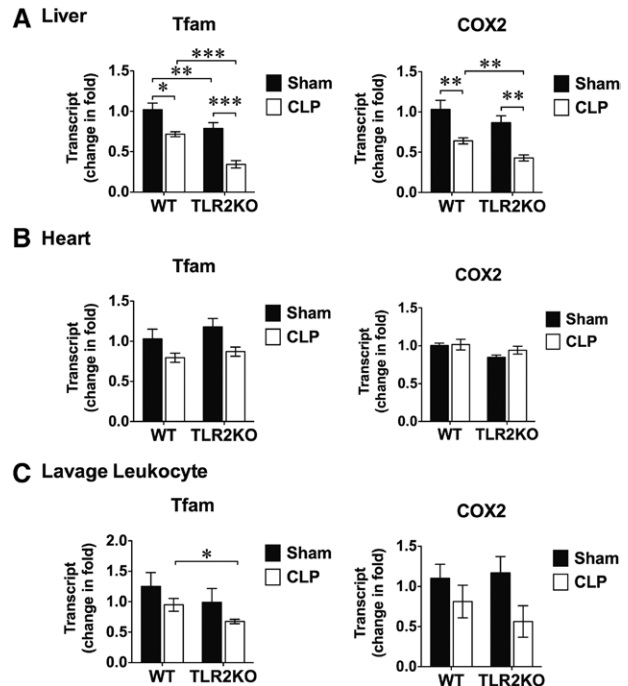

**Fig. 7.** Mitochondrial gene expression in polymicrobial sepsis. WT and TLR2<sup>-/-</sup> mice were subjected to Sham or CLP procedure. After 24h of surgery, liver, heart, and peritoneal cells were harvested. Total RNA was extracted and mitochondrial gene expression was measured by quantitative reverse transcription polymerase chain reaction and normalized to GAPDH levels. \**P* < 0.05, \*\**P* < 0.01, \*\*\**P* < 0.001. The numbers of animals in each group: A, n = 6 mice in each group; B, n = 6 in each group; C, Tfam, n = 11 in WT-sham, n = 9 in TLR2KO sham, n = 6 in CLP groups; COX-2: n = 9 in WT-sham, n = 9 in TLR2KO sham, n = 5 in WT CLP group, n = 6 in TLR2KO CLP group. Each error bar represents mean ± SEM. CLP = cecum ligation and puncture; COX-2 = cytochrome c oxidase subunit II; GAPDH = glyceraldehyde 3-phosphate dehydrogenase; Tfam = mitochondrial transcript factor A; TLR2KO = TLR2 knockout; WT = wild type.

III activity. In comparison, mice deficient of TLR2 had significantly improved mitochondrial function with markedly reduced intracellular and mitochondrial ROS production, and significantly improved mitochondrial  $\Delta\Psi_m$  and intracellular ATP production. However, TLR2 deficiency had no impact on mitochondrial complex III activity in both sham and sepsis animals. Finally, we found that polymicrobial sepsis in mice led to depletion of mitochondrial Tfam and COX-2 gene expression in the liver and this process seems independent of TLR2.

We have observed that TLR1/2 activation by Pam3csy leads to a robust production of both cellular H<sub>2</sub>O<sub>2</sub> and mitochondrial O<sub>2</sub><sup>-</sup>. Cellular ROS (including O<sub>2</sub><sup>-</sup> and H<sub>2</sub>O<sub>2</sub>) is generated not only *via* nicotinamide adenine dinucleotide phosphate oxidase-dependent respiratory burst but also through mitochondrial oxidative phosphorylation process. Mitochondria are a major site for ROS production.<sup>41</sup> During the normal respiration process, ROS is produced as



by-product when high-energy electrons escape before they reach the final acceptor oxygen. The first ROS produced in mitochondria is the highly reactive superoxide anion ( $O_2^-$ ), which can mediate oxidative damage to cells. Superoxide dismutase, an intrinsic antioxidant defense system, converts  $O_2^-$  into a much more stable ROS,  $H_2O_2$ .<sup>38,42</sup>  $O_2^-$  has very limited membrane permeability, but  $H_2O_2$  can diffuse across membranes<sup>43,44</sup> and leave mitochondrion to cytosol.<sup>45</sup> Therefore, it is very much likely that the increased mitochondrial ROS production contributes to a portion of the increased intracellular ROS in the leukocytes after TLR1/2 stimulation or during polymicrobial sepsis.

Our previous study shows that activation of TLR1/2, but not TLR3, TLR4, or TLR9, induces a marked intracellular  $H_2O_2$  production in rat cardiomyocytes and mouse bone marrow-derived neutrophils.<sup>28</sup> Consistent with this, the current study demonstrates a highly selective and robust effect for TLR1/2 in its ability to induce mitochondrial  $O_2^-$  production in neutrophils. A similar finding has been reported in macrophages, where TLR1/2 activation induces mitochondrial ROS production *via* a mechanism involving TRAF-6 mitochondrial translocation and interaction with a complex I-associated protein evolutionarily conserved signaling intermediate in Toll pathways.<sup>23</sup> Interestingly, under the same conditions and unlike antimycin A (a complex III inhibitor), TLR1/2 activation by Pam3cys seems incapable of causing mitochondrial dysfunction. Pam3cys treatment has no effect on mitochondrial  $\Delta\Psi_m$  and intracellular ATP production, which has been linked to mitochondrial  $O_2^-$  production. Importantly, while mitochondria may produce more ROS at higher membrane potential,<sup>34,35</sup> lower  $\Delta\Psi_m$  and decreased activity of the respiratory chain during mitochondrial dysfunction is associated with a simultaneous increase in ROS production<sup>36</sup> as we have demonstrated in antimycin A-treated leukocytes. These data suggest that TLR1/2 activation alone does not induce depolarization of mitochondrial  $\Delta\Psi_m$  and subsequent impairment of oxidative phosphorylation and thus is insufficient to impair mitochondrial function. Mitochondrial ROS generation has been linked with several key cellular processes, such as cell death, cellular oxidative stress, inflammatory cytokine production,<sup>46</sup> and macrophage bactericidal activity.<sup>23</sup> We have shown that TLR2 activation leads to several proinflammatory cytokine production.<sup>28</sup> Thus, it is possible that TLR2-induced ROS production may serve as an intracellular signal transducing molecules in cytokine production, rather than a sign of mitochondrial dysfunction and oxidative stress in normal peritoneal leukocytes. Interestingly, in our study, TLR4 activation by lipopolysaccharide fails to induce intracellular  $H_2O_2$  production and only induces a very modest increase in mitochondrial  $O_2^-$  level in neutrophils. However, in macrophages, lipopolysaccharide reportedly induces marked ROS production including mitochondrial ROS<sup>23,47</sup> and results in mitochondrial dysfunction and biogenesis in the heart and liver.<sup>48-50</sup>

We demonstrate that polymicrobial sepsis leads to a robust increase in intracellular and mitochondrial ROS production in leukocytes isolated from the infectious peritonitis site. Moreover, TLR2 deficiency markedly reduces ROS production in the peritoneal leukocytes compared with WT mice, suggesting that TLR2 signaling may contribute to leukocyte ROS production during polymicrobial sepsis. To further probe the underlying mechanisms, we tested the effect of TLR2 on mitochondrial function and identified that polymicrobial infection led to marked mitochondrial dysfunction in leukocytes with significantly reduced mitochondrial  $\Delta\Psi_m$  and intracellular ATP production. In comparison, mice deficient of TLR2 had preserved mitochondrial  $\Delta\Psi_m$  and significantly improved intracellular ATP production. These data suggest that TLR2 signaling may play a contributory role in mitochondrial dysfunction and subsequent mitochondrial ROS production during polymicrobial sepsis. As demonstrated before, TLR2-deficient mice have markedly improved neutrophil migratory and phagocytic function, enhanced blood bacterial clearance and reduced systemic cytokine productions compared with WT mice during polymicrobial sepsis.<sup>27,28,51</sup> Collectively, these studies demonstrate that TLR2 signaling plays a central role in regulating mitochondrial function, cellular ROS production, leukocyte migration, and phagocytosis during polymicrobial sepsis.

Antimycin A is a specific inhibitor of mitochondrial complex III. It inhibits succinate and nicotinamide adenine dinucleotide phosphate oxidase, and mitochondrial electron transport between cytochromes b and c. The inhibition of electron transport causes the production of ROS and results in a collapse of the proton gradient across the mitochondrial inner membrane, thereby breaking down the mitochondrial  $\Delta\Psi_m$  and reducing intracellular ATP generation.<sup>52-56</sup> Distinctly different from antimycin A, TLR 2 activation exhibits no effect on mitochondrial  $\Delta\Psi_m$  and ATP production even it leads to increased ROS production. This implies that TLR2-mediated mitochondrial ROS production is not associated with mitochondrial dysfunction including that of complex III activity. Similarly, *in vivo*, septic mice exhibit marked reduction in mitochondrial complex III activity and reduced gene expression of Tfam and COX-2. However, TLR2 deficiency does not protect against complex III activity inhibition or mtDNA depletion during polymicrobial sepsis although it does improve mitochondrial  $\Delta\Psi_m$  and intracellular ATP production. Further investigation will be needed to understand the molecular mechanisms by which TLR2 signaling mediates mitochondrial ROS generation in healthy condition and then contributes to mitochondrial dysfunction and ROS production during severe polymicrobial sepsis.

A significant amount of work has been done in determining the role of oxidative stress and mitochondrial dysfunction in sepsis-induced organ injury.<sup>57</sup> Lowes *et al.*<sup>58</sup> found that mitochondria-targeted antioxidant Mito Q reduces

ROS production in lipopolysaccharide-treated endothelial cells, arguments mitochondrial membrane potential in major organs, and reduces acute liver and kidney dysfunction after lipopolysaccharide-peptidoglycan administration. Moreover, *in vivo* administration of superoxide dismutase, a free-radical scavenger, prevents endotoxin-induced cardiac dysfunction.<sup>59</sup> These studies appear to suggest that cell oxidative stress and mitochondrial dysfunction during endotoxemia can lead to organ dysfunction. However, the role of mitochondrial ROS in organ dysfunction during polymicrobial sepsis is less clear. Although we have demonstrated the importance of TLR2 in mitochondrial dysfunction as well as cardiac dysfunction in polymicrobial sepsis,<sup>27,28</sup> whether mitochondrial dysfunction and oxidative stress induce cardiac functional impairment remains to be investigated.

Different animal models of sepsis have been created and categorized as three classes: (1) bacterial infusion models, (2) endotoxin models, and (3) polymicrobial peritonitis models. Infusion models utilize bolus or short-term infusion of bacteria.<sup>60</sup> These models do not correlate well with the clinical situations where in most cases, there is a focus of infection providing continuous dissemination of bacteria. Endotoxin model simulates the clinical situation of hyperinflammation and septic shock.<sup>61</sup> Endotoxin models are highly reproducible and can provide great insight into inflammatory processes.<sup>62</sup> However, these models lack an infectious focus and do not closely mimic the pathophysiology observed in septic patients. Bacterial peritonitis models closely resemble the clinical condition of sepsis after bowel perforation. The most widely used peritonitis model is CLP. Similar to many clinical cases of sepsis, CLP model induces polymicrobial sepsis, but the model has a wide variability in terms of the host inflammatory and physiological responses, and the degree of bacteremia and mortality rates.<sup>62,63</sup> Another limitation of the CLP model is the lack of clear information on the specific pathogens and the associated pathogen components in the pathogenesis of sepsis as the models involve a mixture of several types of bacteria including both Gram-positive and Gram-negative organisms.<sup>64</sup>

In summary (fig. 8), our data suggest that TLR1/2 activation by Pam3cys is capable of inducing intracellular H<sub>2</sub>O<sub>2</sub> and mitochondrial O<sub>2</sub><sup>-</sup> production although it seems insufficient to cause mitochondrial dysfunction. In a mouse model of severe polymicrobial sepsis and employing TLR2-deficient mice, we demonstrate that TLR2 signaling contributes to intracellular and mitochondrial ROS production and mitochondrial dysfunction as evidenced by depleted ATP production and loss of mitochondrial membrane potential ( $\Delta\Psi$ m) in leukocytes. However, sepsis induced other mitochondrial dysfunction in leukocytes such as complex III dysfunction in leukocytes and mtDNA reduction in the liver seems to be TLR2-independent. Nevertheless, this study illustrates an important role of TLR2 in mitochondrial

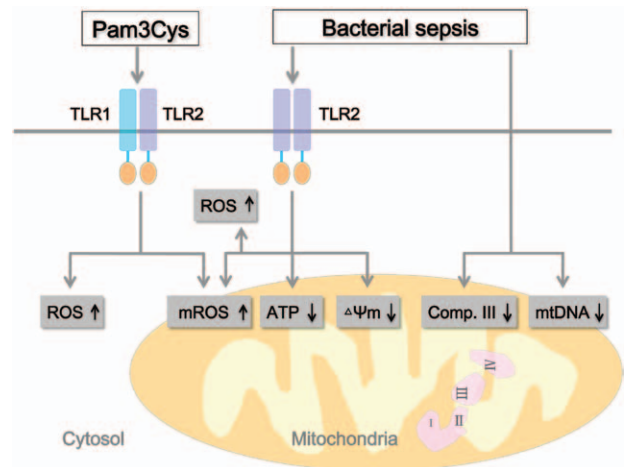

**Fig. 8.** Schematic view of the proposed role of TLR2 in mitochondrial dysfunction during polymicrobial sepsis. Activation of TLR1/2 heterodimer by Pam3cys leads to production of ROS, including cellular H<sub>2</sub>O<sub>2</sub> or mitochondrial O<sub>2</sub><sup>-</sup> in peritoneal leukocytes. Polymicrobial sepsis induces mitochondrial dysfunction as evidenced by mROS production, ATP depletion, loss of mitochondrial membrane potential ( $\Delta\Psi$ m), complex III dysfunction in leukocytes, and mtDNA reduction in the liver. mROS production, ATP depletion, and  $\Delta\Psi$ m reduction are mediated via TLR2-dependent mechanisms.  $\Delta\Psi$ m = membrane potential; ATP = adenosine triphosphate; Comp. III = complex III; H<sub>2</sub>O<sub>2</sub> = hydrogen peroxide; mROS = mitochondrial reactive oxygen species; mtDNA = mitochondrial DNA; O<sub>2</sub><sup>-</sup> = mitochondrial superoxide; TLR2 = Toll-like receptor 2.

dysfunction, which might contribute to the pathogenesis of organ failure during severe sepsis.

## Acknowledgments

This work was supported in part by the National Institutes of Health (grant nos. R01-GM080906 and R01-GM097259), Bethesda, Maryland (to Dr. Chao), and a mentored research award from the International Anesthesia Research Society, San Francisco, California (to Dr. Zou).

## Competing Interests

The authors declare no competing interests.

## Correspondence

Address correspondence to Dr. Chao: Massachusetts General Hospital, Harvard Medical School, Room 4.212, 149 13th Street, Charlestown, Massachusetts 02129. wchao@mgh.harvard.edu. This article may be accessed for personal use at no charge through the Journal Web site, www.anesthesiology.org.

## References

- Levy MM, Fink MP, Marshall JC, Abraham E, Angus D, Cook D, Cohen J, Opal SM, Vincent JL, Ramsay G; SCCM/ESICM/ACCP/ATS/SIS: 2001 SCCM/ESICM/ACCP/ATS/SIS International Sepsis Definitions Conference. Crit Care Med 2003; 31:1250-6
- Angus DC, Linde-Zwirble WT, Lidicker J, Clermont G, Carcillo J, Pinsky MR: Epidemiology of severe sepsis in the United

- States: Analysis of incidence, outcome, and associated costs of care. *Crit Care Med* 2001; 29:1303–10
3. Dombrovskiy VY, Martin AA, Sunderram J, Paz HL: Rapid increase in hospitalization and mortality rates for severe sepsis in the United States: A trend analysis from 1993 to 2003. *Crit Care Med* 2007; 35:1244–50
  4. Bateman BT, Schmidt U, Berman MF, Bittner EA: Temporal trends in the epidemiology of severe postoperative sepsis after elective surgery: A large, nationwide sample. *Anesthesiology* 2010; 112:917–25
  5. Miniño AM, Heron MP, Smith BL: Deaths: Preliminary data for 2004. *Natl Vital Stat Rep* 2006; 54:1–49
  6. Crouser ED: Mitochondrial dysfunction in septic shock and multiple organ dysfunction syndrome. *Mitochondrion* 2004; 4:729–41
  7. Exline MC, Crouser ED: Mitochondrial mechanisms of sepsis-induced organ failure. *Front Biosci* 2008; 13:5030–41
  8. Azevedo LC: Mitochondrial dysfunction during sepsis. *Endocr Metab Immune Disord Drug Targets* 2010; 10:214–23
  9. Cohen J: The immunopathogenesis of sepsis. *Nature* 2002; 420:885–91
  10. Brealey D, Brand M, Hargreaves I, Heales S, Land J, Smolenski R, Davies NA, Cooper CE, Singer M: Association between mitochondrial dysfunction and severity and outcome of septic shock. *Lancet* 2002; 360:219–23
  11. Brealey D, Karyampudi S, Jacques TS, Novelli M, Stidwill R, Taylor V, Smolenski RT, Singer M: Mitochondrial dysfunction in a long-term rodent model of sepsis and organ failure. *Am J Physiol Regul Integr Comp Physiol* 2004; 286:R491–7
  12. Galley HF: Oxidative stress and mitochondrial dysfunction in sepsis. *Br J Anaesth* 2011; 107:57–64
  13. Taylor DE, Ghio AJ, Piantadosi CA: Reactive oxygen species produced by liver mitochondria of rats in sepsis. *Arch Biochem Biophys* 1995; 316:70–6
  14. Andrades M, Ritter C, de Oliveira MR, Streck EL, Fonseca Moreira JC, Dal-Pizzol F: Antioxidant treatment reverses organ failure in rat model of sepsis: Role of antioxidant enzymes imbalance, neutrophil infiltration, and oxidative stress. *J Surg Res* 2011; 167:e307–13
  15. Ritter C, Andrades M, Reinke A, Menna-Barreto S, Moreira JC, Dal-Pizzol F: Treatment with N-acetylcysteine plus deferoxamine protects rats against oxidative stress and improves survival in sepsis. *Crit Care Med* 2004; 32:342–9
  16. Ritter C, Andrades M, Moreira JC, Dal-Pizzol F, Hussain SN: Superoxide production during sepsis development. *Am J Respir Crit Care Med* 2003; 167:474; author reply 474–5
  17. Singer M: The role of mitochondrial dysfunction in sepsis-induced multi-organ failure. *Virulence* 2014; 5:66–72
  18. Rudiger A, Singer M: Mechanisms of sepsis-induced cardiac dysfunction. *Crit Care Med* 2007; 35:1599–608
  19. Ishii KJ, Akira S: Toll-like receptors and sepsis. *Curr Infect Dis Rep* 2004; 6:361–6
  20. Feng Y, Chao W: Toll-like receptors and myocardial inflammation. *Int J Inflam* 2011; 2011:170352
  21. Chao W: Toll-like receptor signaling: A critical modulator of cell survival and ischemic injury in the heart. *Am J Physiol Heart Circ Physiol* 2009; 296:H1–12
  22. Djafarzadeh S, Vuda M, Takala J, Ochs M, Jakob SM: Toll-like receptor-3-induced mitochondrial dysfunction in cultured human hepatocytes. *Mitochondrion* 2011; 11:83–8
  23. West AP, Brodsky IE, Rahner C, Woo DK, Erdjument-Bromage H, Tempst P, Walsh MC, Choi Y, Shadel GS, Ghosh S: TLR signalling augments macrophage bactericidal activity through mitochondrial ROS. *Nature* 2011; 472:476–80
  24. Suliman HB, Welty-Wolf KE, Carraway MS, Schwartz DA, Hollingsworth JW, Piantadosi CA: Toll-like receptor 4 mediates mitochondrial DNA damage and biogenic responses after heat-inactivated *E. coli*. *FASEB J* 2005; 19:1531–3
  25. Bauerfeld CP, Rastogi R, Pirockinaite G, Lee I, Hüttemann M, Monks B, Birnbaum MJ, Franchi L, Nuñez G, Samavati L: TLR4-mediated AKT activation is MyD88/TRIF dependent and critical for induction of oxidative phosphorylation and mitochondrial transcription factor A in murine macrophages. *J Immunol* 2012; 188:2847–57
  26. Zhu X, Bagchi A, Zhao H, Kirschning CJ, Hajjar RJ, Chao W, Hellman J, Schmidt U: Toll-like receptor 2 activation by bacterial peptidoglycan-associated lipoprotein activates cardiomyocyte inflammation and contractile dysfunction. *Crit Care Med* 2007; 35:886–92
  27. Zou L, Feng Y, Chen YJ, Si R, Shen S, Zhou Q, Ichinose F, Scherrer-Crosbie M, Chao W: Toll-like receptor 2 plays a critical role in cardiac dysfunction during polymicrobial sepsis. *Crit Care Med* 2010; 38:1335–42
  28. Zou L, Feng Y, Zhang M, Li Y, Chao W: Nonhematopoietic toll-like receptor 2 contributes to neutrophil and cardiac function impairment during polymicrobial sepsis. *Shock* 2011; 36:370–80
  29. Bergt S, Wagner NM, Heidrich M, Butschkau A, Nöldge-Schomburg GE, Vollmar B, Roesner JP: Hydrocortisone reduces the beneficial effects of toll-like receptor 2 deficiency on survival in a mouse model of polymicrobial sepsis. *Shock* 2013; 40:414–9
  30. Pène F, Grimaldi D, Zuber B, Sauneuf B, Rousseau C, El Hachem C, Martin C, Belaïdouni N, Balloy V, Mira JP, Chiche JD: Toll-like receptor 2 deficiency increases resistance to *Pseudomonas aeruginosa* pneumonia in the setting of sepsis-induced immune dysfunction. *J Infect Dis* 2012; 206:932–42
  31. Takeuchi O, Hoshino K, Kawai T, Sanjo H, Takada H, Ogawa T, Takeda K, Akira S: Differential roles of TLR2 and TLR4 in recognition of gram-negative and gram-positive bacterial cell wall components. *Immunity* 1999; 11:443–51
  32. Feng Y, Zou L, Si R, Nagasaka Y, Chao W: Bone marrow MyD88 signaling modulates neutrophil function and ischemic myocardial injury. *Am J Physiol Cell Physiol* 2010; 299:C760–9
  33. Zou L, Feng Y, Li Y, Zhang M, Chen C, Cai J, Gong Y, Wang L, Thurman JM, Wu X, Atkinson JP, Chao W: Complement factor B is the downstream effector of TLRs and plays an important role in a mouse model of severe sepsis. *J Immunol* 2013; 191:5625–35
  34. Korshunov SS, Skulachev VP, Starkov AA: High protonic potential actuates a mechanism of production of reactive oxygen species in mitochondria. *FEBS Lett* 1997; 416:15–8
  35. Miwa S, Brand MD: Mitochondrial matrix reactive oxygen species production is very sensitive to mild uncoupling. *Biochem Soc Trans* 2003; 31(Pt 6):1300–1
  36. Ly JD, Grubb DR, Lawen A: The mitochondrial membrane potential ( $\Delta\psi(m)$ ) in apoptosis; an update. *Apoptosis* 2003; 8:115–28
  37. Kirkinetzos IG, Moraes CT: Reactive oxygen species and mitochondrial diseases. *Semin Cell Dev Biol* 2001; 12:449–57
  38. Turrens JF: Mitochondrial formation of reactive oxygen species. *J Physiol* 2003; 552(Pt 2):335–44
  39. Yakes FM, Van Houten B: Mitochondrial DNA damage is more extensive and persists longer than nuclear DNA damage in human cells following oxidative stress. *Proc Natl Acad Sci U S A* 1997; 94:514–9
  40. Choumar A, Tarhuni A, Lettéron P, Reyl-Desmays F, Dauhoo N, Damasse J, Vadrot N, Nahon P, Moreau R, Pessayre D, Mansouri A: Lipopolysaccharide-induced mitochondrial DNA depletion. *Antioxid Redox Signal* 2011; 15:2837–54
  41. Dupré-Crochet S, Erard M, Nüße O: ROS production in phagocytes: Why, when, and where? *J Leukoc Biol* 2013; 94:657–70
  42. Fridovich I: Superoxide radical and superoxide dismutases. *Annu Rev Biochem* 1995; 64:97–112

43. Salvador A, Sousa J, Pinto RE: Hydroperoxyl, superoxide and pH gradients in the mitochondrial matrix: A theoretical assessment. *Free Radic Biol Med* 2001; 31:1208–15
44. Mumbengegwi DR, Li Q, Li C, Bear CE, Engelhardt JF: Evidence for a superoxide permeability pathway in endosomal membranes. *Mol Cell Biol* 2008; 28:3700–12
45. West AP, Shadel GS, Ghosh S: Mitochondria in innate immune responses. *Nat Rev Immunol* 2011; 11:389–402
46. Naik E, Dixit VM: Mitochondrial reactive oxygen species drive proinflammatory cytokine production. *J Exp Med* 2011; 208:417–20
47. Hsu HY, Wen MH: Lipopolysaccharide-mediated reactive oxygen species and signal transduction in the regulation of interleukin-1 gene expression. *J Biol Chem* 2002; 277:22131–9
48. Suliman HB, Carraway MS, Welty-Wolf KE, Whorton AR, Piantadosi CA: Lipopolysaccharide stimulates mitochondrial biogenesis *via* activation of nuclear respiratory factor-1. *J Biol Chem* 2003; 278:41510–8
49. Suliman HB, Welty-Wolf KE, Carraway M, Tatro L, Piantadosi CA: Lipopolysaccharide induces oxidative cardiac mitochondrial damage and biogenesis. *Cardiovasc Res* 2004; 64:279–88
50. Carchman EH, Whelan S, Loughran P, Mollen K, Stratamirovic S, Shiva S, Rosengart MR, Zuckerbraun BS: Experimental sepsis-induced mitochondrial biogenesis is dependent on autophagy, TLR4, and TLR9 signaling in liver. *FASEB J* 2013; 27:4703–11
51. Alves-Filho JC, Freitas A, Souto FO, Spiller F, Paula-Neto H, Silva JS, Gazzinelli RT, Teixeira MM, Ferreira SH, Cunha FQ: Regulation of chemokine receptor by Toll-like receptor 2 is critical to neutrophil migration and resistance to polymicrobial sepsis. *Proc Natl Acad Sci U S A* 2009; 106:4018–23
52. Gille L, Nohl H: The ubiquinol/bc1 redox couple regulates mitochondrial oxygen radical formation. *Arch Biochem Biophys* 2001; 388:34–8
53. Campo ML, Kinnally KW, Tedeschi H: The effect of antimycin A on mouse liver inner mitochondrial membrane channel activity. *J Biol Chem* 1992; 267:8123–7
54. Alexandre A, Lehninger AL: Bypasses of the antimycin a block of mitochondrial electron transport in relation to ubiquinone function. *Biochim Biophys Acta* 1984; 767:120–9
55. Pham NA, Robinson BH, Hedley DW: Simultaneous detection of mitochondrial respiratory chain activity and reactive oxygen in digitonin-permeabilized cells using flow cytometry. *Cytometry* 2000; 41:245–51
56. Chen Q, Vazquez EJ, Moghaddas S, Hoppel CL, Lesnfsky EJ: Production of reactive oxygen species by mitochondria: Central role of complex III. *J Biol Chem* 2003; 278:36027–31
57. Fink MP: Reactive oxygen species as mediators of organ dysfunction caused by sepsis, acute respiratory distress syndrome, or hemorrhagic shock: Potential benefits of resuscitation with Ringer's ethyl pyruvate solution. *Curr Opin Clin Nutr Metab Care* 2002; 5:167–74
58. Lowes DA, Thottakam BM, Webster NR, Murphy MP, Galley HF: The mitochondria-targeted antioxidant MitoQ protects against organ damage in a lipopolysaccharide-peptidoglycan model of sepsis. *Free Radic Biol Med* 2008; 45:1559–65
59. Supinski GS, Callahan LA: Polyethylene glycol-superoxide dismutase prevents endotoxin-induced cardiac dysfunction. *Am J Respir Crit Care Med* 2006; 173:1240–7
60. Deitch EA: Animal models of sepsis and shock: A review and lessons learned. *Shock* 1998; 9:1–11
61. Fink MP, Heard SO: Laboratory models of sepsis and septic shock. *J Surg Res* 1990; 49:186–96
62. Schultz MJ, van der Poll T: Animal and human models for sepsis. *Ann Med* 2002; 34:573–81
63. Rittirsch D, Huber-Lang MS, Flierl MA, Ward PA: Immunodesign of experimental sepsis by cecal ligation and puncture. *Nat Protoc* 2009; 4:31–6
64. Hotchkiss RS, Swanson PE, Cobb JP, Jacobson A, Buchman TG, Karl IE: Apoptosis in lymphoid and parenchymal cells during sepsis: Findings in normal and T- and B-cell-deficient mice. *Crit Care Med* 1997; 25:1298–307
